# Supplementary material for: The VAAST Variant Prioritizer (VVP): ultrafast, easy to use whole genome variant prioritization tool
Source: PubMed Central journal article supplement (PMC5819680; doi:10.1186/s12859-018-2056-y), 2018-02-20

### Clinvar – CADD

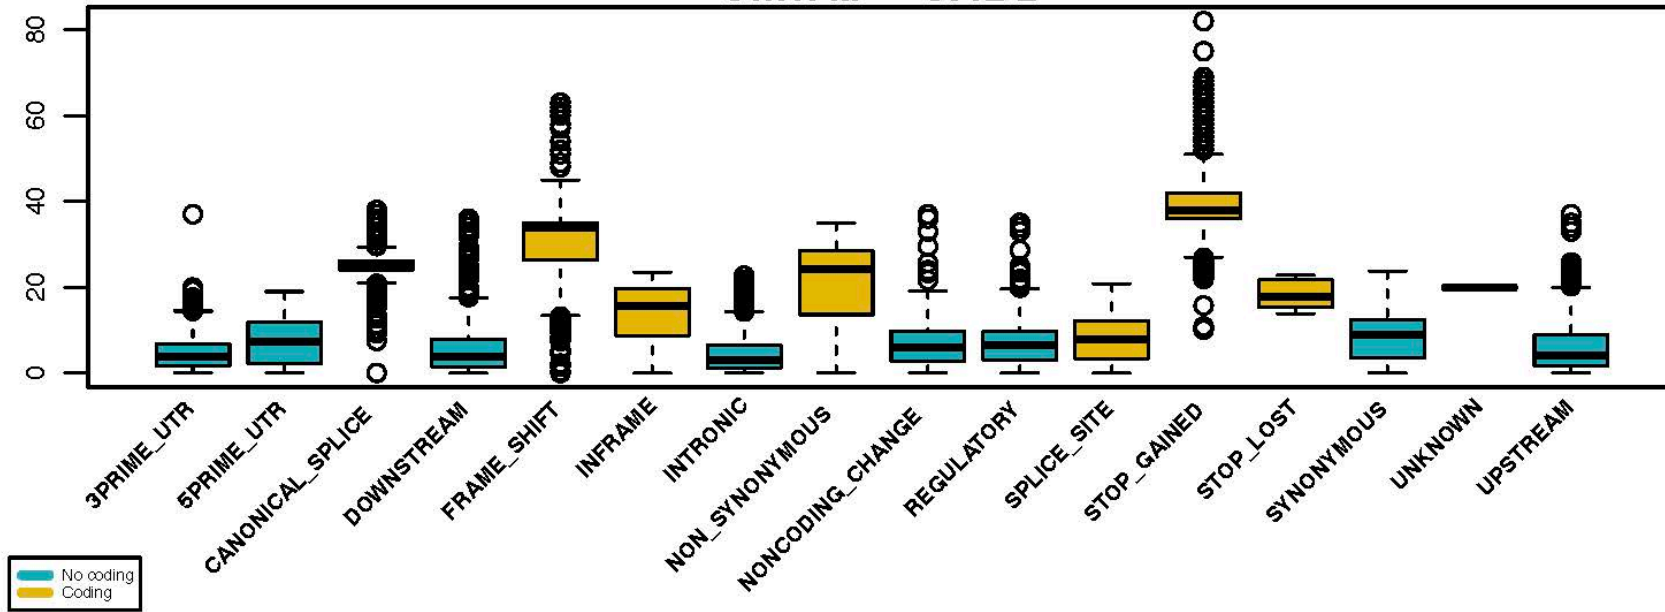

### NA12878 – CADD

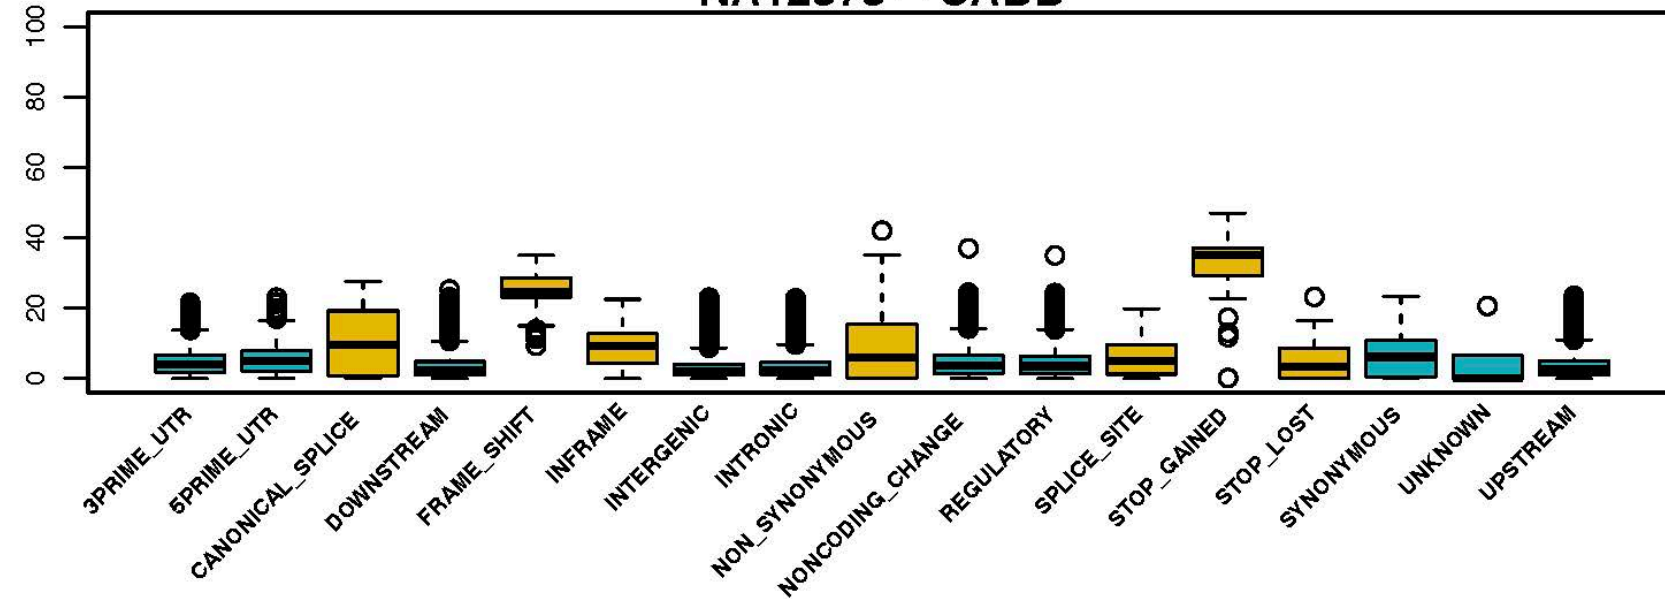

Supplement: 12859_2018_2056_MOESM4_ESM.pdf [file 12859_2018_2056_MOESM4_ESM.pdf]
